# Supplementary material for: Biotemplating: a sustainable synthetic methodology for Na-ion battery materials
Source: Royal Society of Chemistry journal article supplement (doi:10.1039/c7ta09260a), 2017-12-11
Supplement: c7ta09260a1.pdf [file c7ta09260a1.pdf]

## Supplementary Information

### Biotemplating: A Sustainable Synthetic Methodology for Na-ion Battery Materials

Silvija Zilinskaite,<sup>a</sup> Anthony J. R. Rennie,<sup>b</sup> Rebecca Boston,<sup>\*a</sup> Nik Reeves-McLaren<sup>\*a</sup>

<sup>a</sup>Department of Materials Science and Engineering, University of Sheffield, Sheffield, S1 3JD, UK.

<sup>b</sup>Department of Chemical and Biological Engineering, University of Sheffield, Sheffield, S1 3JD, UK.

Table S1. Surface areas and pore volumes derived from nitrogen adsorption isotherms (at 77K)

| Calcination |          | Physical properties                                            |                                                                 |                                                               |                                                                 |                                                                  |
|-------------|----------|----------------------------------------------------------------|-----------------------------------------------------------------|---------------------------------------------------------------|-----------------------------------------------------------------|------------------------------------------------------------------|
| Temp. / °C  | Time / h | S <sub>BET</sub> <sup>a</sup> / m <sup>2</sup> g <sup>-1</sup> | S <sub>meso</sub> <sup>b</sup> / m <sup>2</sup> g <sup>-1</sup> | V <sub>t</sub> <sup>c</sup> / cm <sup>3</sup> g <sup>-1</sup> | V <sub>mic</sub> <sup>d</sup> / cm <sup>3</sup> g <sup>-1</sup> | V <sub>meso</sub> <sup>e</sup> / cm <sup>3</sup> g <sup>-1</sup> |
| 550         | 2        | 108.0                                                          | 37.8                                                            | 0.1358                                                        | 0.0077                                                          | 0.0559                                                           |
|             | 5        | 127.7                                                          | 45.4                                                            | 0.1643                                                        | 0.0888                                                          | 0.0669                                                           |
|             | 12       | 52.9                                                           | 20.5                                                            | 0.0970                                                        | 0.0296                                                          | 0.0382                                                           |
| 650         | 2        | 38.6                                                           | 14.6                                                            | 0.0535                                                        | 0.0233                                                          | 0.0210                                                           |
|             | 5        | 36.9                                                           | 12.7                                                            | 0.0377                                                        | 0.0242                                                          | 0.0158                                                           |
|             | 12       | 33.3                                                           | 11.9                                                            | 0.0297                                                        | 0.0233                                                          | 0.0135                                                           |
| 750         | 2        | 38.4                                                           | 11.9                                                            | 0.0280                                                        | 0.0350                                                          | 0.0113                                                           |
|             | 5        | 27.4                                                           | 8.0                                                             | 0.0152                                                        | 0.0326                                                          | 0.0063                                                           |
|             | 12       | 31.6                                                           | 9.2                                                             | 0.0190                                                        | 0.0317                                                          | 0.0078                                                           |
| 850         | 2        | 33.8                                                           | 10.7                                                            | 0.0212                                                        | 0.0340                                                          | 0.0094                                                           |
|             | 5        | 33.8                                                           | 5.1                                                             | 0.0231                                                        | 0.0264                                                          | 0.0689                                                           |
|             | 12       | 29.3                                                           | 9.6                                                             | 0.0182                                                        | 0.0235                                                          | 0.0084                                                           |
| Solid state |          | 21.5                                                           | 7.4                                                             | 0.0138                                                        | 0.0248                                                          | 0.0065                                                           |

<sup>a</sup>specific surface area calculated using the BET method <sup>b</sup>mesopore surface area determined using BJH method

<sup>c</sup>total pore volume calculated at P/P<sub>0</sub>>0.99 <sup>d</sup>micropore volume determined using the Dubinin Astakhov method

<sup>e</sup>mesopore volume determined using BJH method

---

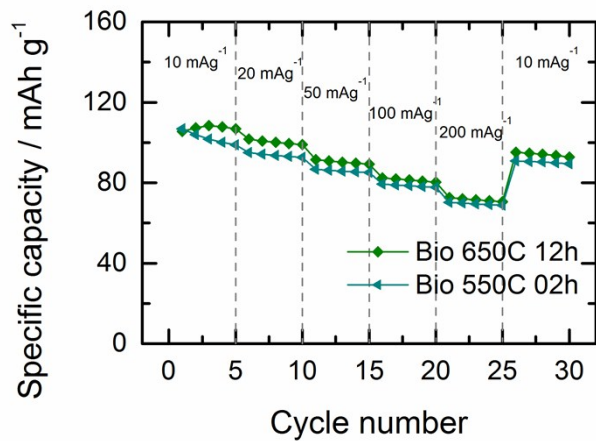

Figure S1. Specific discharge capacities of biotemplated  $\text{Na}_{2/3}\text{Ni}_{1/3}\text{Mn}_{2/3}\text{O}_2$  calcined at  $650\text{ }^\circ\text{C}$  for 12 h, and  $550\text{ }^\circ\text{C}$  2h at rates between  $10\text{ mA g}^{-1}$  and  $200\text{ mA g}^{-1}$ .

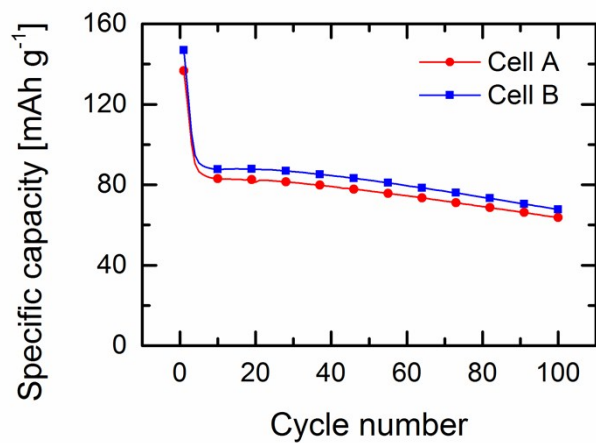

Figure S2. Extended cycling behaviour for two cells containing biotemplated  $\text{Na}_{2/3}\text{Ni}_{1/3}\text{Mn}_{2/3}\text{O}_2$  calcined at  $850\text{ }^\circ\text{C}$  for 12 h, at a rate of  $10\text{ mA g}^{-1}$ .

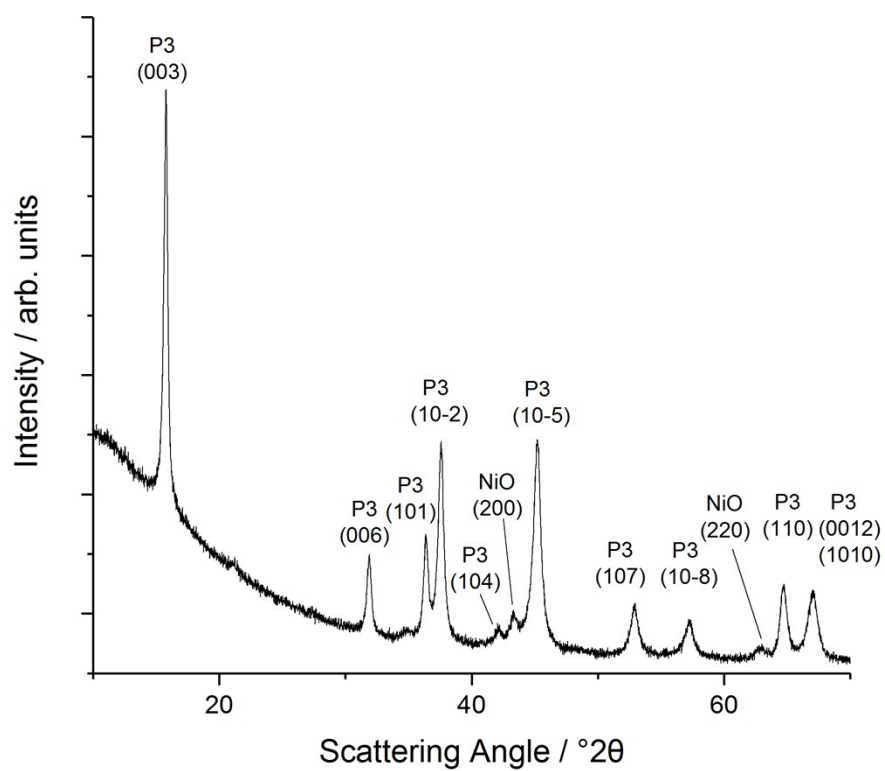

Figure S3a – Indexed diffraction pattern for biotemplated  $\text{Na}_{2/3}\text{Ni}_{1/3}\text{Mn}_{2/3}\text{O}_2$  calcined at 550 °C for 12 h

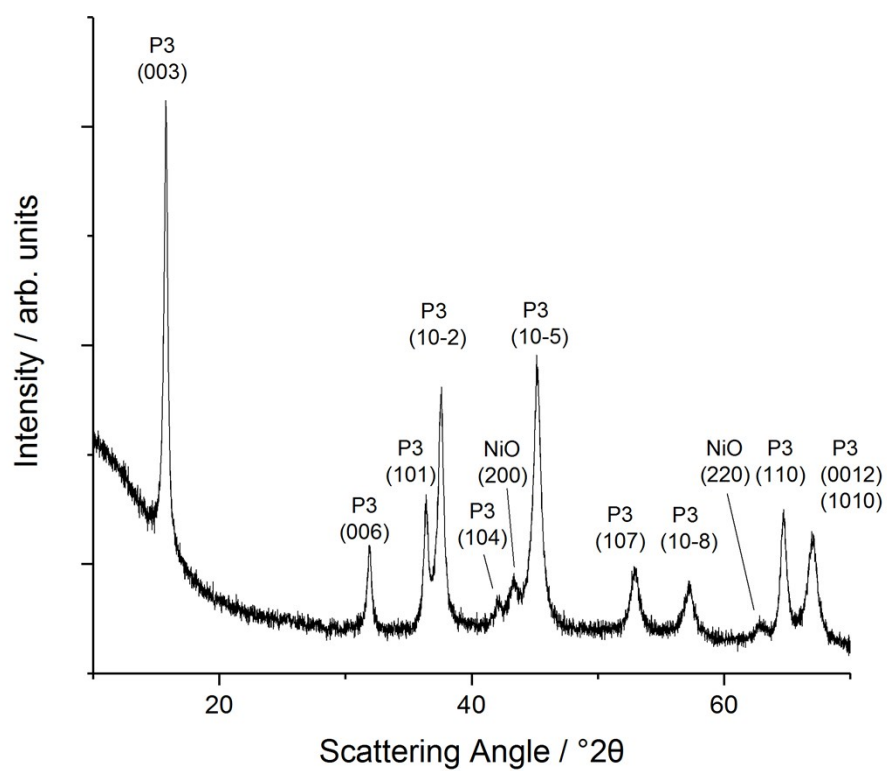

Figure S3b – Indexed diffraction pattern for biotemplated  $\text{Na}_{2/3}\text{Ni}_{1/3}\text{Mn}_{2/3}\text{O}_2$  calcined at 650 °C for 2 h

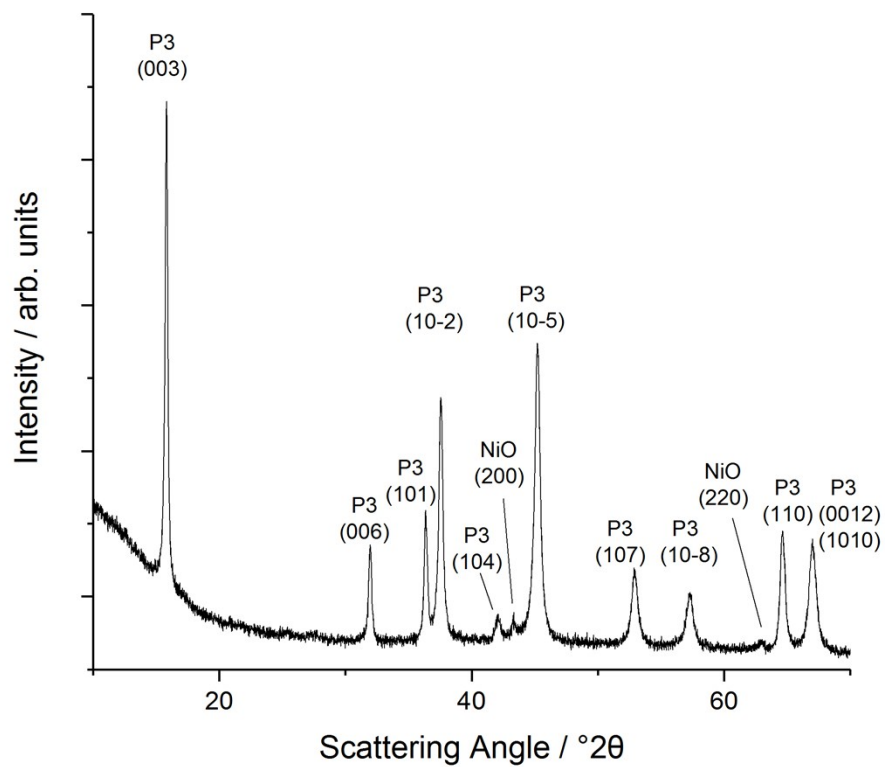

Figure S3c – Indexed diffraction pattern for biotemplated  $\text{Na}_{2/3}\text{Ni}_{1/3}\text{Mn}_{2/3}\text{O}_2$  calcined at 650 °C for 5 h

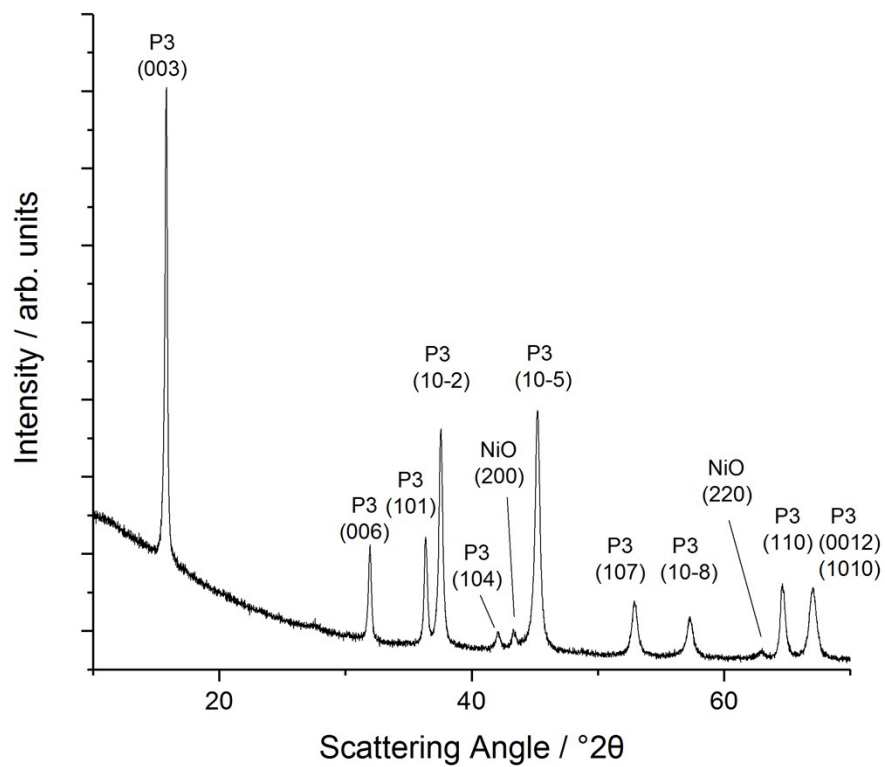

Figure S3d – Indexed diffraction pattern for biotemplated  $\text{Na}_{2/3}\text{Ni}_{1/3}\text{Mn}_{2/3}\text{O}_2$  calcined at 650 °C for 12 h

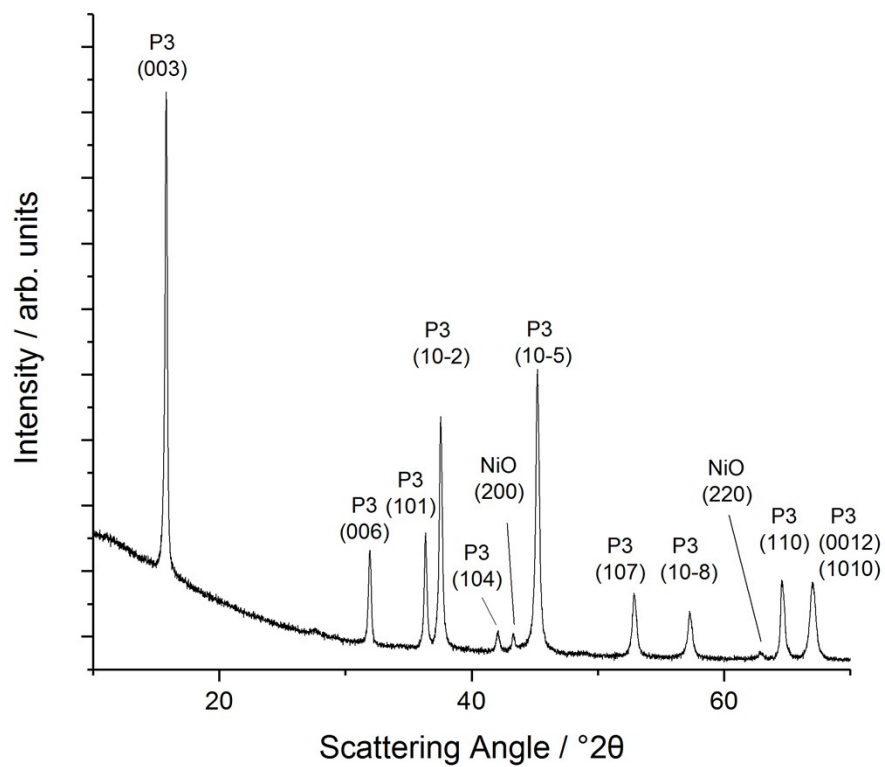

Figure S3e – Indexed diffraction pattern for biotemplated  $\text{Na}_{2/3}\text{Ni}_{1/3}\text{Mn}_{2/3}\text{O}_2$  calcined at 750 °C for 12 h

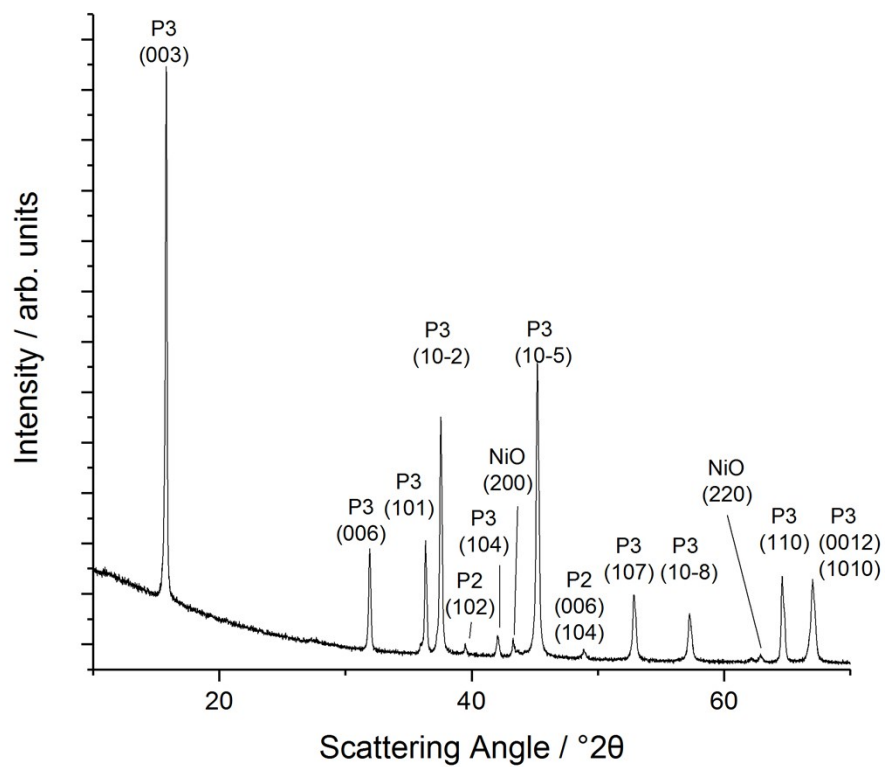

Figure S3f – Indexed diffraction pattern for biotemplated  $\text{Na}_{2/3}\text{Ni}_{1/3}\text{Mn}_{2/3}\text{O}_2$  calcined at 850 °C for 12 h



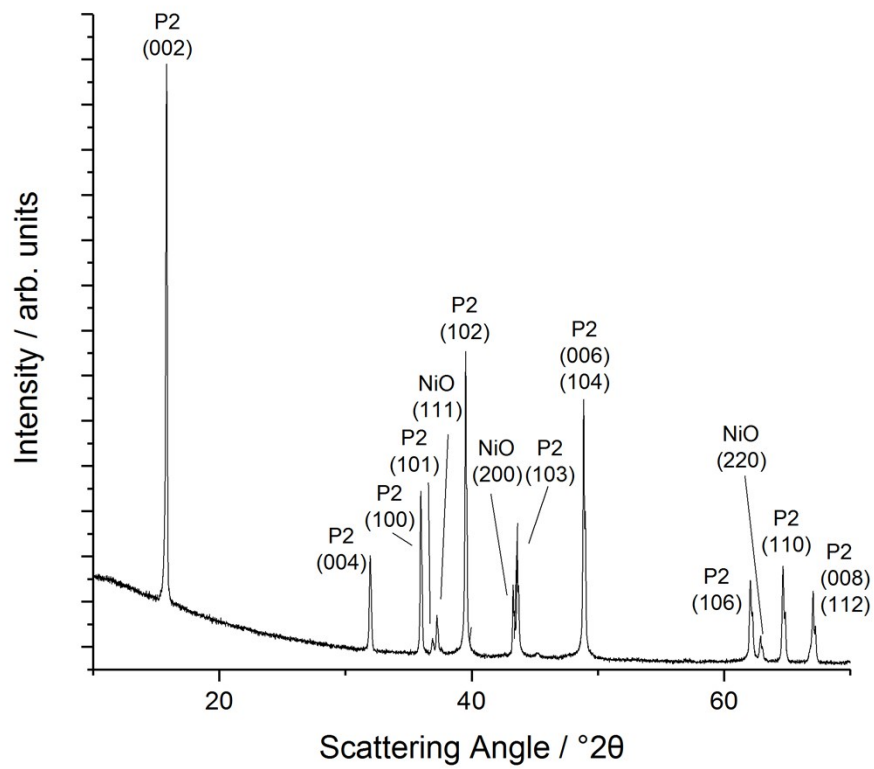

Figure S3g – Indexed diffraction pattern for  $\text{Na}_{2/3}\text{Ni}_{1/3}\text{Mn}_{2/3}\text{O}_2$  made via solid state reaction, calcined at 850 °C for 12 h
